# Supplementary material for: Association of Hormonal Contraception With Suicide Attempts and Suicides
Source: Atypon-hosted journal article supplement (doi:10.1176/appi.ajp.2017.17060616), 2017-11-17
Supplement: appi.ajp.2017.17060616.ds001.pdf [file appi.ajp.2017.17060616.ds001.pdf]

## Contents

|                                                                                                                                                                                                                                          |    |
|------------------------------------------------------------------------------------------------------------------------------------------------------------------------------------------------------------------------------------------|----|
| <b>Table S1.</b> Articles on hormonal contraception and suicide .....                                                                                                                                                                    | 2  |
| <b>Table S2.</b> Included groups of hormonal contraception and corresponding ATC codes .....                                                                                                                                             | 3  |
| <b>Table S3.</b> Included diagnoses of suicide an suicide attempt according to the international Statistical Classifications of Diseases and Related Health Problems Tenth Revision (ICD10) .....                                        | 4  |
| <b>Table S4.</b> Included diagnoses of venous thromboses from the international Statistical Classifications of Diseases and Related Health Problems Eight and Tenth Revision .....                                                       | 5  |
| <b>Figure S1.</b> Women fulfilling various inclusion and exclusion criteria .....                                                                                                                                                        | 6  |
| <b>Figure S2.</b> Lexis-diagram: a cohort of women followed from the age of 15 through the period 1996 to 2013. ....                                                                                                                     | 7  |
| <b>Table S5.</b> Hazard ratio of a first suicide attempt according to use of different types of hormonal contraception.....                                                                                                              | 8  |
| <b>Table S6.</b> Hazard ratio of a first suicide attempt according to use of different types of hormonal contraception with 30-40 µg levonorgestrel as reference and of progestogen only pills with all oral combined as reference. .... | 9  |
| <b>Figure S3.</b> Quantitative bias analysis: Hazard Ratio(HR) of suicide attempt as a function of the odds ratio of being a user of hormonal contraception, for prevalence of 33% of an unknown confounder in the population.....       | 10 |

**TABLE S1.** Articles on hormonal contraception and suicide

| Author<br>Year                               | Study<br>design | Expo-<br>sure | Reference           | Population                                           | Age    | Events | Persons-years          | Results<br>Risk of suicide                       |
|----------------------------------------------|-----------------|---------------|---------------------|------------------------------------------------------|--------|--------|------------------------|--------------------------------------------------|
| <b>Vessey<sup>1</sup></b><br>1989<br>England | Cohort          | OC            | Diaphragm<br>or IUD | Married women<br>Visiting family<br>planning clinics | 25–39* | 16     | 272,512<br>1968–1986   | 1.1 (0.3–3.6)<br>No significant<br>difference    |
| <b>Beral<sup>2</sup></b><br>1999<br>Britain  | Cohort          | OC            | Never use           | Women from<br>general practices                      | 29*    | 55     | 853,571<br>1968–1993   | 1.5 (0.8–2.3)<br>No significant<br>difference    |
| <b>Colditz<sup>3</sup></b><br>1994<br>USA    | Cohort          | OC            | Never use           | Nurses Health<br>study                               | 30–55* | 114    | 1,300,000<br>1976–1988 | 1.32 (0.87–1.98)<br>No significant<br>difference |
| <b>Hannafor<sup>4</sup></b><br>2010<br>UK    | Cohort          | OC            | Never use           | Married women<br>or living<br>as married             | 29*    | 67     | 1,197,181<br>1968–2007 | 1.26 (0.73–2.18)<br>No significant<br>difference |
| <b>Charlton<sup>5</sup></b><br>2014<br>USA   | Cohort          | OC            | Never use           | Nurses Health<br>study                               | 30–55  | 241    | 3.6 mil                | 1.41 (1.05–1.87)<br>Significantly<br>increased   |

OC=Oral contraceptives; IUD=Intrauterine device. \*Mean age at recruitment.

1. Vessey MP, Villard-Mackintosh L, McPherson K, et al: Mortality among oral contraceptive users: 20 year follow up of women in a cohort study. *BMJ* 1989; 299:1487–1491.
2. Beral V, Hermon C, Kay C, Hannafor<sup>4</sup> P, Darby S, Reeves G. Mortality associated with oral contraceptive use: 25 year follow up of cohort of 46 000 women from Royal College of General Practitioners' oral contraception study. *BMJ* 1999;318:96-100.
3. Colditz GA. Oral contraceptive use and mortality during 12 years of follow-up: the Nurses' Health Study. *Ann Intern Med.* 1994;120:821-6.
4. Hannafor<sup>4</sup> PC, Iversen L, Macfarlane TV, Elliott AM, Angus V, Lee AJ. Mortality among contraceptive pill users: cohort evidence from Royal College of General Practitioners' Oral Contraception Study. *BMJ* 2010;340:c927.
5. Charlton BM, Rich-Edwards JW, Colditz GA, Missmer SA, Rosner BA, Hankinson SE, Speizer FE, Michels KB. Oral contraceptive use and mortality after 36 years of follow-up in the Nurses' Health Study: prospective cohort study. *BMJ* 2014;349:g6356

**TABLE S2.** Included groups of hormonal contraception and corresponding ATC codes

| <b>Hormonal<br/>contraception group<sup>§</sup></b> | <b>ATC codes*</b>                  |
|-----------------------------------------------------|------------------------------------|
| <b>Combined products</b>                            |                                    |
| <b>Oral</b>                                         |                                    |
| <b>20-50 µg EE</b>                                  |                                    |
| Norethisterone                                      | G03AA01, G03AA03, G03AA05, G03AB04 |
| Levonorgestrel                                      | G03AA07, G03AB03                   |
| Norgestimate                                        | G03AA11                            |
| Desogestrel                                         | G03AA09, G03AB05                   |
| Gestodene                                           | G03AA10, G03AB06                   |
| Drospirenone                                        | G03AA12                            |
| CPA                                                 | G03HB01                            |
| <b>Natural estrogen</b>                             |                                    |
| Dienogest                                           | G03AB                              |
| NOMAC                                               | G03AA14                            |
| <b>Non-oral</b>                                     |                                    |
| Patch (norelgestromin)                              | G03AA13                            |
| Vaginal ring (etonogestrel)                         | G02BB01                            |
| <b>Progestin-only products</b>                      |                                    |
| <b>Oral</b>                                         |                                    |
| All progestogen only pills                          | G03AC01, G03AC02, G03AC03, G03AC09 |
| <b>Non-oral</b>                                     |                                    |
| Implant                                             | G03AC08                            |
| LNG-IUS                                             | G02BA03                            |
| MPA depot                                           | G03DA02                            |

<sup>§</sup> EE=ethinylestradiol; CPA=cyproterone acetate; LNG-IUS=levonorgestrel intrauterine system; NOMAC=nomegestrol acetate; MPA=medroxyprogesterone acetate.

\* ATC=Anatomical Therapeutic Chemical classification.

**TABLE S3.** Included diagnoses of suicide an suicide attempt according to ICD-10

|                      | <b>Suicide</b> | <b>Suicide attempt</b> |       |
|----------------------|----------------|------------------------|-------|
| <b>8th revision</b>  |                | E9500 to E9599         |       |
| <b>10th revision</b> | X6001          | X6010                  | X7310 |
|                      | X6101          | X6011                  | X7311 |
|                      | X6201          | X6110                  | X7410 |
|                      | X6301          | X6111                  | X7411 |
|                      | X6401          | X6210                  | X7510 |
|                      | X6501          | X6211                  | X7511 |
|                      | X6601          | X6310                  | X7610 |
|                      | X6701          | X6311                  | X7611 |
|                      | X6801          | X6410                  | X7710 |
|                      | X6901          | X6411                  | X7711 |
|                      | X7001          | X6510                  | X7810 |
|                      | X7101          | X6511                  | X7811 |
|                      | X7201          | X6610                  | X7910 |
|                      | X7301          | X6611                  | X7911 |
|                      | X7401          | X6710                  | X8010 |
|                      | X7501          | X6711                  | X8011 |
|                      | X7601          | X6810                  | X8110 |
|                      | X7701          | X6811                  | X8111 |
|                      | X7801          | X6910                  | X8210 |
|                      | X7901          | X6911                  | X8211 |
|                      | X8001          | X7010                  | X8310 |
|                      | X8101          | X7011                  | X8311 |
|                      | X8201          | X7110                  | X8320 |
|                      | X8301          | X7111                  | X8410 |
|                      | X8320          | X7210                  | X8411 |
|                      | X8401          | X7211                  | Z915A |

**TABLE S4.** Included diagnoses of venous thromboses from ICD-8 and ICD-10

|                     | ICD-8     | ICD-10                                        | Diagnose                                             |
|---------------------|-----------|-----------------------------------------------|------------------------------------------------------|
| <b>Non pregnant</b> | 450       | I260, I269                                    | Pulmonary embolism                                   |
|                     | 438       | I676                                          | Sinus thrombosis                                     |
|                     |           | I801                                          | Thrombophlebitis in vena femoralis                   |
|                     | 451.08    | I802                                          | Deep vein thrombosis in the legs                     |
|                     | 451.00    | I803                                          | Unspecified deep vein thrombosis in the legs         |
|                     |           | I808                                          | Phlebitis a thrombophlebitis with other localization |
|                     |           | I808A                                         | Phlebitis with other localization                    |
|                     |           | I808B                                         | Thrombophlebitis with other localization             |
|                     |           | I808D                                         | Phlebitis et thrombophlebitis venae jugularis        |
|                     | 452       | I819                                          | Thrombosis of the portal vein                        |
|                     | 453.02    | I822                                          | Thrombosis or embolism in the vena cava              |
|                     |           | I823                                          | Thrombosis or embolism in the vena renalis           |
|                     |           | I828                                          | Thrombosis or embolism in other designated veins     |
| 451.99              | I829      | Thrombosis or embolism in non-specified veins |                                                      |
| <b>Pregnant</b>     |           | O087A                                         | Phlebitis after extra-uterine pregnancy              |
|                     |           | O087B                                         | Phlebitis after molar pregnancy                      |
|                     |           | O087C                                         | Phlebitis after abortion                             |
|                     |           | O087D                                         | Thrombophlebitis after molar pregnancy               |
|                     |           | O087E                                         | Thrombophlebitis after extra-uterine pregnancy       |
|                     |           | O087F                                         | Thrombophlebitis after abortion                      |
|                     |           | O223                                          | Phlebothrombosis profunda in graviditate             |
|                     |           | O225                                          | Thrombosis venae cerebri in graviditate              |
|                     |           | O225A                                         | Thrombosis sinuum venosum cerebri in graviditate     |
|                     |           | O228                                          | Venous complications of pregnancy, others            |
|                     |           | O229                                          | Venous complications of pregnancy without spec.      |
|                     | 671.01/02 | O871                                          | Thrombophlebitis profunda puerperalis                |
|                     | 671.03    | O871A                                         | Thrombophlebitis pelvis puerperalis                  |
|                     |           | O873                                          | Thrombosis venae cerebri puerperalis                 |
|                     |           | O873A                                         | Thrombosis sinuum venosum cerebri puerperalis        |
|                     | 671.08    | O878                                          | Venous complications in the puerperium, other        |
|                     | 671.09    | O879                                          | Venous complications in the puerperium without spec. |
| 634.59, 673.09      | O880      | Embolia aëris obstetrica                      |                                                      |
| 673.19              | O881      | Embolia fluidi amniotici                      |                                                      |
| 673.99              | O882      | Embolia obstetrica                            |                                                      |

**FIGURE S1.** Women fulfilling various inclusion and exclusion criteria

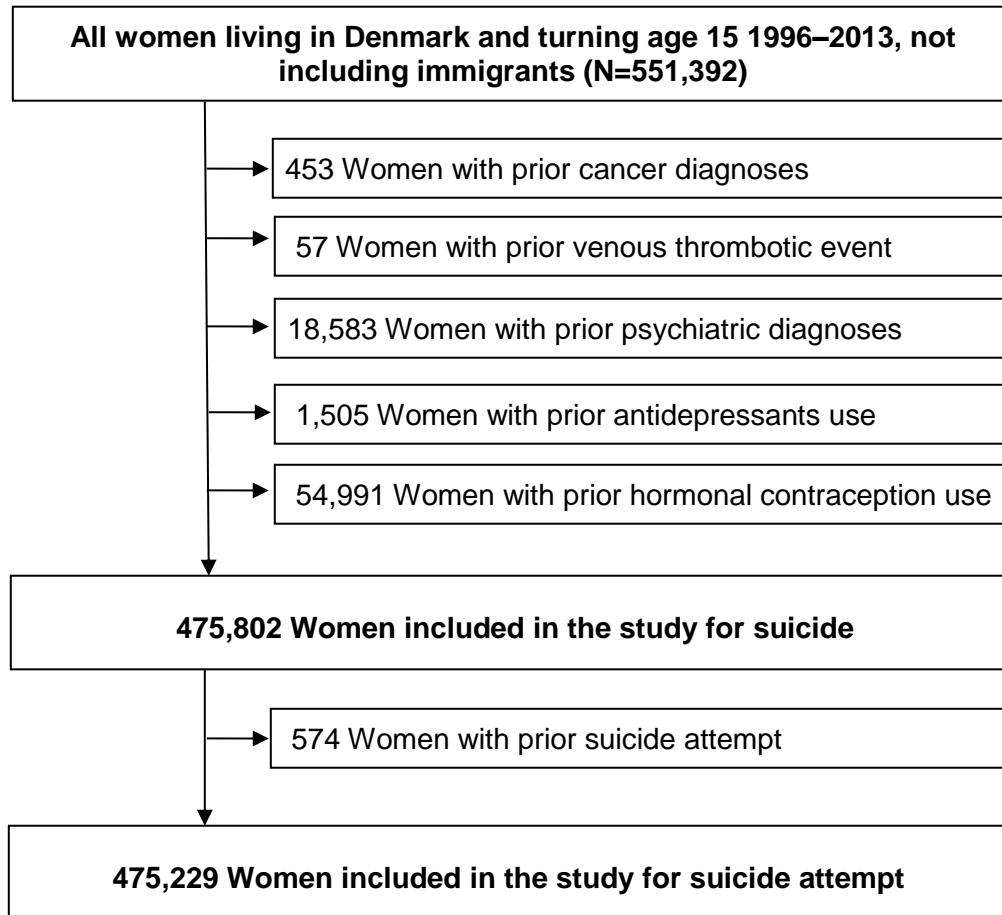

**FIGURE S2.** Lexis diagram: a cohort of women followed from age 15 through the period 1996–2013

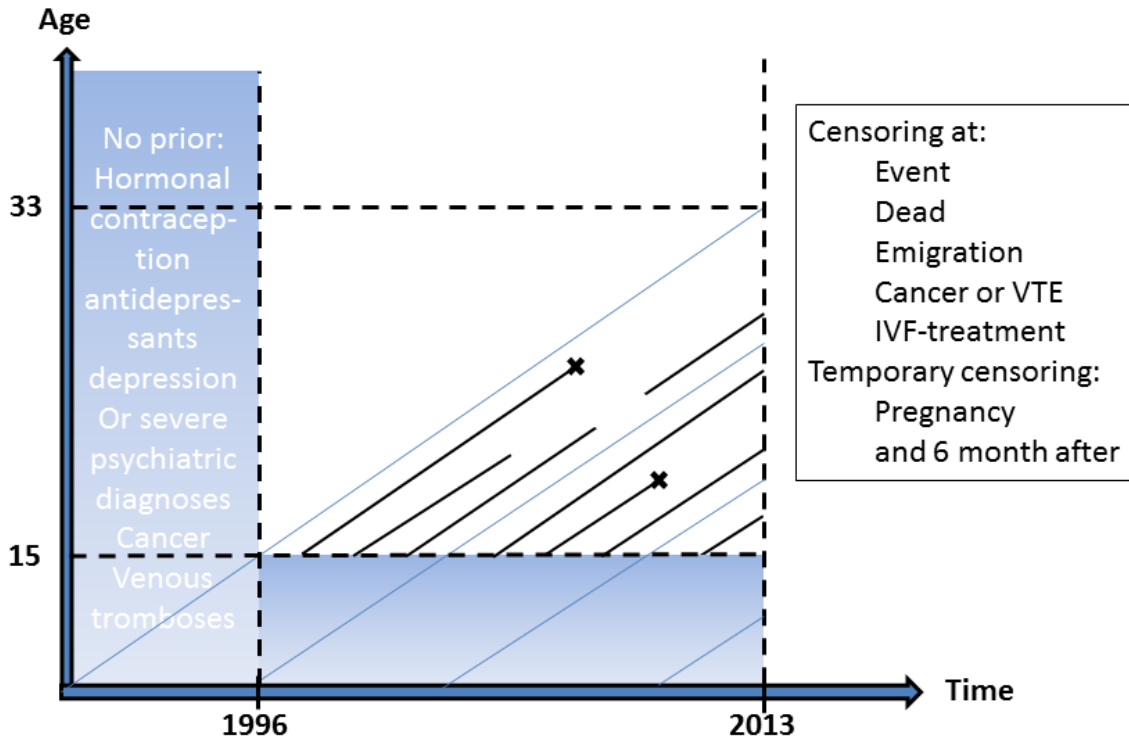

**TABLE S5.** Hazard ratio of a first suicide attempt according to use of different types of hormonal contraception

| Type of hormonal contraception     | Person Years | First suicide attempt | Hazard ratio <sup>1</sup><br>[95% CL] | Hazard ratio <sup>2</sup><br>[95% CL] |
|------------------------------------|--------------|-----------------------|---------------------------------------|---------------------------------------|
| Never use                          | 1,387,917    | 2,049                 | Reference                             | Reference                             |
| All hormonal contraceptive         | 2,127,374    | 3,898                 | <b>1.82</b> [1.71-1.94]               | <b>1.97</b> [1.85-2.10]               |
| Former use                         | 405,527      | 1,052                 | <b>3.76</b> [3.45-4.11]               | <b>3.40</b> [3.11-3.71]               |
| <b>Combined products</b>           |              |                       |                                       |                                       |
| <b>Oral</b>                        |              |                       |                                       |                                       |
| All oral combined                  | 1,983,435    | 3,528                 | <b>1.75</b> [1.64-1.87]               | <b>1.91</b> [1.79-2.03]               |
| <b>50 µg Ethinylestradiol</b>      |              |                       |                                       |                                       |
| Levonorgestrel                     | 4,263        | 14                    | <b>3.04</b> [1.80-5.15]               | <b>2.78</b> [1.64-4.71]               |
| <b>20-40 µg Ethinylestradiol</b>   |              |                       |                                       |                                       |
| Norethisterone                     | 10,824       | 31                    | <b>1.95</b> [1.37-2.79]               | <b>2.03</b> [1.42-2.90]               |
| Levonorgestrel                     | 175,565      | 267                   | <b>1.63</b> [1.43-1.87]               | <b>1.81</b> [1.58-2.07]               |
| Norgestimate                       | 168,046      | 307                   | <b>1.80</b> [1.59-2.04]               | <b>1.92</b> [1.70-2.18]               |
| Desogestrel                        | 477,965      | 855                   | <b>1.74</b> [1.60-1.90]               | <b>1.89</b> [1.73-2.06]               |
| Gestodene                          | 782,645      | 1,398                 | <b>1.73</b> [1.60-1.87]               | <b>1.88</b> [1.74-2.03]               |
| Drospirenone                       | 270,591      | 510                   | <b>1.83</b> [1.65-2.03]               | <b>2.05</b> [1.85-2.27]               |
| Cyproterone acetate                | 89,051       | 141                   | <b>1.58</b> [1.33-1.88]               | <b>1.81</b> [1.52-2.16]               |
| <b>Non-oral</b>                    |              |                       |                                       |                                       |
| Patch (norelgestromin)             | 5,302        | 19                    | <b>3.90</b> [2.48-6.14]               | <b>3.28</b> [2.08-5.16]               |
| Vaginal ring (etonogestrel)        | 49,269       | 84                    | <b>2.34</b> [1.87-2.92]               | <b>2.58</b> [2.06-3.22]               |
| <b>Progestin-only products</b>     |              |                       |                                       |                                       |
| <b>Oral</b>                        |              |                       |                                       |                                       |
| All progestin only pills           | 38,965       | 62                    | <b>2.16</b> [1.67-2.79]               | <b>2.29</b> [1.77-2.95]               |
| Norethisterone                     | 13,236       | 27                    | <b>2.63</b> [1.79-3.85]               | <b>2.77</b> [1.89-4.05]               |
| Desogestrel                        | 25,580       | 35                    | <b>1.89</b> [1.35-2.64]               | <b>2.01</b> [1.44-2.81]               |
| <b>Non-oral</b>                    |              |                       |                                       |                                       |
| Implants                           | 18,291       | 107                   | <b>5.85</b> [4.80-7.13]               | <b>4.42</b> [3.63-5.39]               |
| Levonorgestrel intrauterine system | 25,789       | 38                    | <b>3.26</b> [2.35-4.52]               | <b>2.86</b> [2.06-3.97]               |
| Medroxyprogesterone acetate        | 6,322        | 60                    | <b>10.2</b> [7.87-13.2]               | <b>6.52</b> [5.03-8.46]               |

1. Age as underlining time and adjusted for calendar year.

2. Additionally adjusted for education, polycystic ovary syndrome, and endometriosis.



**TABLE S6.** Hazard ratio of a first suicide attempt according to use of different types of hormonal contraception with 30-40 µg levonorgestrel as reference and of progestogen only pills with all oral combined as reference

| Type of hormonal Contraception     | Person Years | First suicide attempt | Hazard ratio <sup>1</sup> [95% CL] | Hazard ratio <sup>1</sup> [95% CL] |
|------------------------------------|--------------|-----------------------|------------------------------------|------------------------------------|
| <b>Combined products</b>           |              |                       |                                    |                                    |
| <b>Oral</b>                        |              |                       |                                    |                                    |
| All oral combined                  | 1,983,435    | 3,528                 |                                    | Reference                          |
| <b>50 µg Ethinylestradiol</b>      |              |                       |                                    |                                    |
| Levonorgestrel                     | 4,263        | 14                    | 1.53 [0.90-2.63]                   |                                    |
| <b>20-40 µg Ethinylestradiol</b>   |              |                       |                                    |                                    |
| Norethisterone                     | 10824        | 31                    | 1.12 [0.77-1.63]                   |                                    |
| Levonorgestrel                     | 175565       | 267                   | Reference                          |                                    |
| Norgestimate                       | 168046       | 307                   | 1.06 [0.90-1.25]                   |                                    |
| Desogestrel                        | 477965       | 855                   | 1.04 [0.91-1.20]                   |                                    |
| Gestodene                          | 782,645      | 1398                  | 1.04 [0.91-1.18]                   |                                    |
| Drospirenone                       | 270,591      | 510                   | 1.13 [0.97-1.31]                   |                                    |
| Cyproterone acetate                | 89,051       | 141                   | 1.00 [0.81-1.23]                   |                                    |
| <b>Non-oral</b>                    |              |                       |                                    |                                    |
| Patch (norelgestromin)             | 5,302        | 19                    | <b>1.81</b> [1.14-2.89]            |                                    |
| Vaginal ring (etonogestrel)        | 49,269       | 84                    | <b>1.42</b> [1.11-1.82]            |                                    |
| <b>Progestin-only products</b>     |              |                       |                                    |                                    |
| <b>Oral</b>                        |              |                       |                                    |                                    |
| All progestin only pills           | 38,965       | 62                    | .                                  | 1.20 [0.93-1.54]                   |
| Norethisterone                     | 13,236       | 27                    | <b>1.53</b> [1.03-2.27]            |                                    |
| Desogestrel                        | 25,580       | 35                    | 1.11 [0.78-1.58]                   |                                    |
| <b>Non-oral</b>                    |              |                       |                                    |                                    |
| Implants                           | 18,291       | 107                   | <b>2.44</b> [1.95-3.06]            |                                    |
| Levonorgestrel intrauterine system | 25,789       | 38                    | <b>1.58</b> [1.12-2.23]            |                                    |
| Medroxyprogesterone acetate        | 6,322        | 60                    | <b>3.60</b> [2.72-4.77]            |                                    |

1. Age as underlining time and adjusted for calendar year, education, polycystic ovary syndrome, and endometriosis.

**FIGURE S3.** Quantitative bias analysis: Hazard ratio (HR) of suicide attempt as a function of the odds ratio (OR) of being a user of hormonal contraception, for prevalence of 33% of an unknown confounder in the population

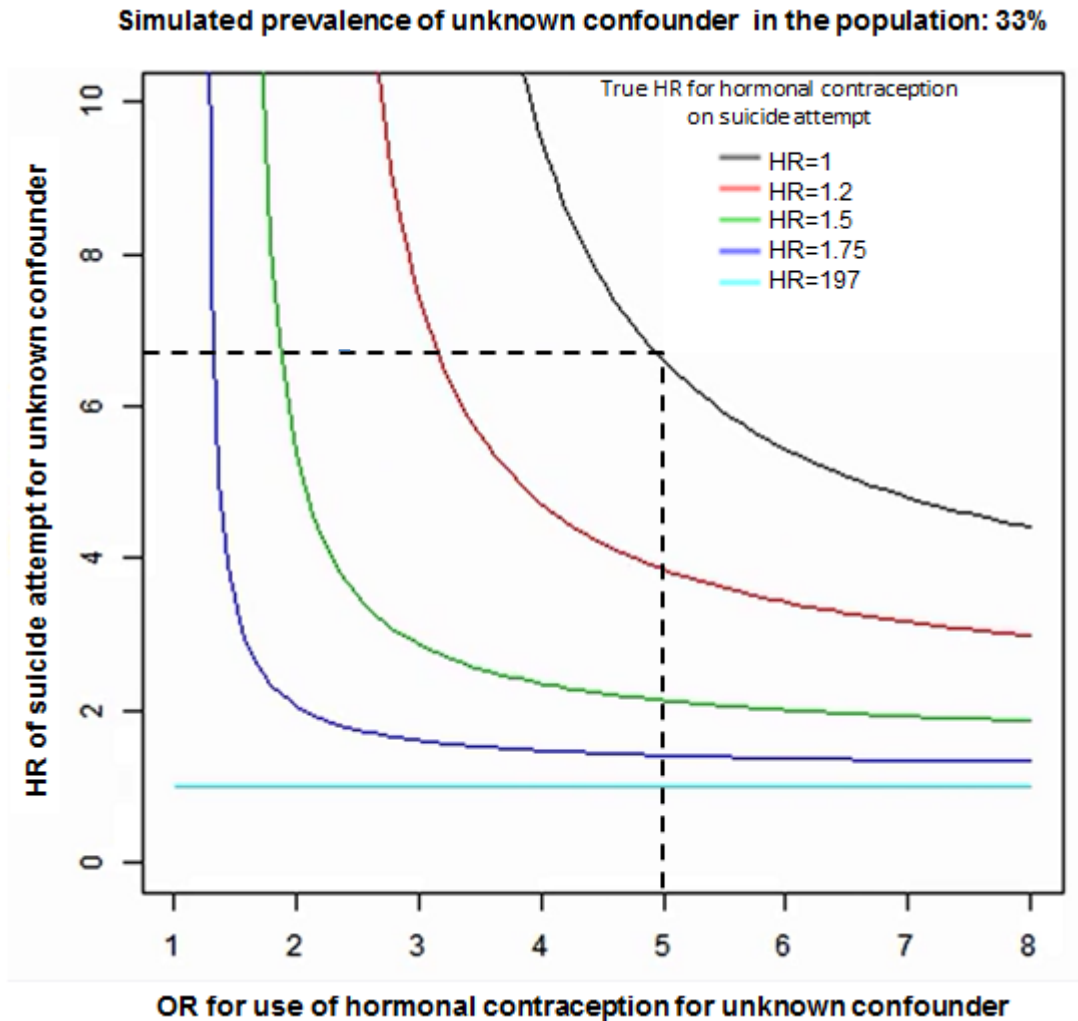

The figure illustrates how much the calculated HR of originally 1.97 will change in case of an unidentified confounder that has a given OR for use of hormonal contraception (x-axis) and different hazard ratios of suicide attempt (y-axis). i.e, a factor implying a fivefold increase in use of hormonal contraception and have a HR of suicide of 6.8, will decrease the HR of suicide among users of hormonal contraception from the initial 1.97 to 1.0 (black curve).
